# Supplementary material for: Novel Hydrophobin Fusion Tags for Plant-Produced Fusion Proteins
Source: PubMed Central journal article supplement (PMC5051927; doi:10.1371/journal.pone.0164032), 2016-10-05
Supplement: pone.0164032.s004.pdf [file pone.0164032.s004.pdf]

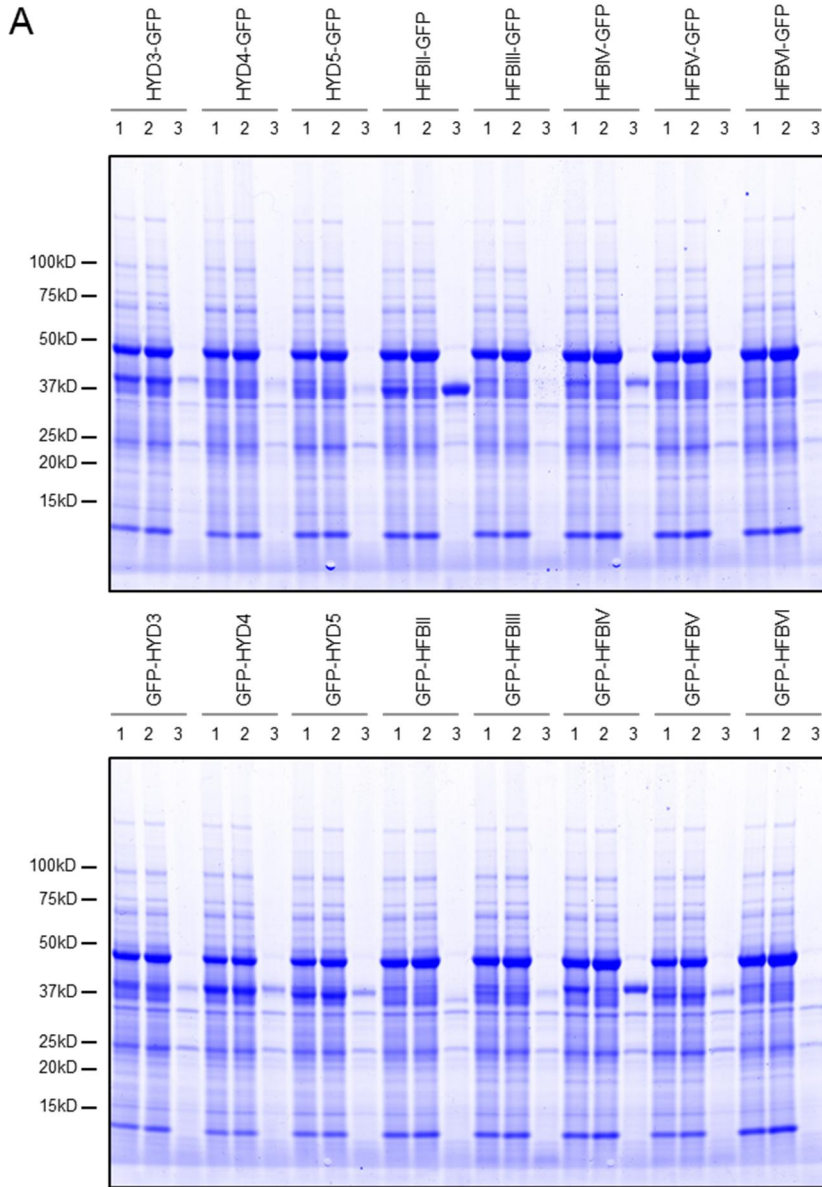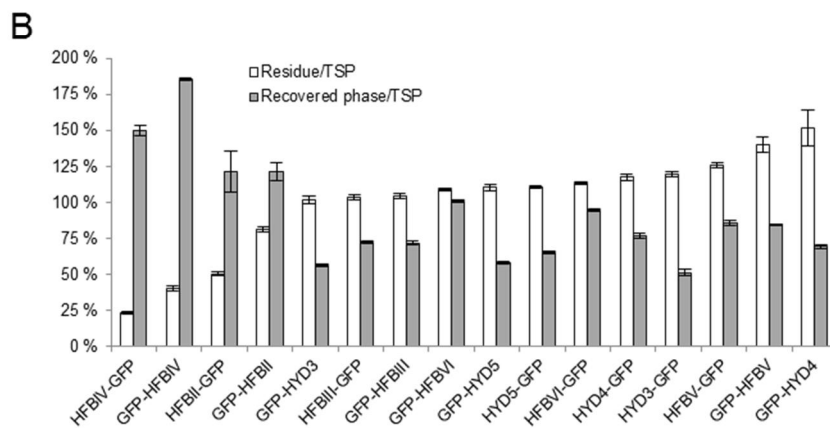

S4 Fig. SDS-PAGE illustrating aqueous two phase separation. (A) Coomassie stained SDS-PAGE gels of representative samples from ATPS (Fig. 1B). Lane numbering refers to: 1) TSP; 2) residue; 3) recovered phase. (B) Concentrations of fusion proteins in residue and recovered phase in comparison to initial concentration in plant leaf extract (TSP). Error bars indicate standard deviation (n=4).
