# Supplementary material for: Novel Hydrophobin Fusion Tags for Plant-Produced Fusion Proteins
Source: PubMed Central journal article supplement (PMC5051927; doi:10.1371/journal.pone.0164032), 2016-10-05
Supplement: pone.0164032.s005.pdf [file pone.0164032.s005.pdf]

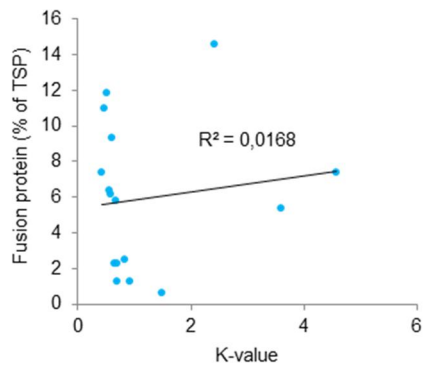

S5 Fig. Protein accumulation levels (means, Fig. 1B) blotted against k-values (means, Fig. 2B).
