# Supplementary material for: Novel Hydrophobin Fusion Tags for Plant-Produced Fusion Proteins
Source: PubMed Central journal article supplement (PMC5051927; doi:10.1371/journal.pone.0164032), 2016-10-05
Supplement: pone.0164032.s007.pdf [file pone.0164032.s007.pdf]

S1 Table. Genbak ID numbers for original gene sequences and Uniprot ID numbers for amino acid sequences used in this study. The sequence coding for the extended N-terminal part of HFBVI, presumably a cell wall binding domain (amino acids 1-179), was not included in the coding sequence.

| Protein | Nucleotide (NCBI*) | Peptide (Uniprot**) | Reference  |
|---------|--------------------|---------------------|------------|
| HFB I   | Z68124.1           | P52754              | [1]        |
| HFB II  | Y11894.1           | P79073              | [2]        |
| HFB III | 18483774           | G0RVE5              | [3]        |
| HFB IV  | 18481287           | G0RHNO              | [4]        |
| HFB V   | 18480804           | G0RBZ9              | this study |
| HFB VI  | 18481131           | G0RFI5              | this study |
| HYD3    | AY155498           | Q6YF30              | [5]        |
| HYD4    | AY155499           | Q6YF29              | [5]        |
| HYD5    | AY158024           | Q6YD93              | [5]        |

\* <http://www.ncbi.nlm.nih.gov/> \*\* <http://www.uniprot.org/>

- [1] Nakari-Setälä, T., Aro, N., Kalkkinen, N., Alatalo, E., et al., Genetic and biochemical characterization of the *Trichoderma reesei* hydrophobin HFBI. *Eur. J. Biochem.* 1996, 235, 248–255.
- [2] Nakari-Setälä, T., Aro, N., IlmeN, M., Munoz, G., et al., Differential Expression of the Vegetative and Spore-Bound Hydrophobins of *Trichoderma reesei* Cloning and Characterization of the Hfb2 Gene. *Eur. J. Biochem.* 1997, 248, 415–423.
- [3] Kisko, K., Szilvay, G.R., Vuorimaa, E., Lemmetyinen, H., et al., Self-assembled films of hydrophobin protein HFBIII from *Trichoderma reesei*. *J. Appl. Crystallogr.* 2007, 40, 355–360.
- [4] Espino-Rammer, L., Ribitsch, D., Przylucka, A., Marold, A., et al., Two novel class II hydrophobins from *Trichoderma* spp. stimulate enzymatic hydrolysis of poly(ethylene terephthalate) when expressed as fusion proteins. *Appl. Environ. Microbiol.* 2013, 79, 4230–8.
- [5] Fuchs, U., Czymmek, K.J., Sweigard, J.A., Five hydrophobin genes in *Fusarium verticillioides* include two required for microconidial chain formation. *Fungal Genet. Biol.* 2004, 41, 852–64.
