# Supplementary material for: Novel Hydrophobin Fusion Tags for Plant-Produced Fusion Proteins
Source: PLoS One. 2016 Oct 5;11(10):e0164032. doi: 10.1371/journal.pone.0164032 (PMC5051927; doi:10.1371/journal.pone.0164032)
Supplement: S1 Fig — (A) A schematic presentation of the expression cassettes. Genes for HFB, linker and GFP were cloned in the vector between BsaI restriction sites using Golden gate assembly. (B) The full nucleotide and amino acid sequences of the coding region of the expression cassette for representative construct: HFBII-GFP. (C) Sequence data for HFBIII, (D) HFBIV, (E) HFBV, (F) HFBVI, (G) HYD3, (H) HYD4 and (I) HYD5. (PDF) [file pone.0164032.s001.pdf]

A

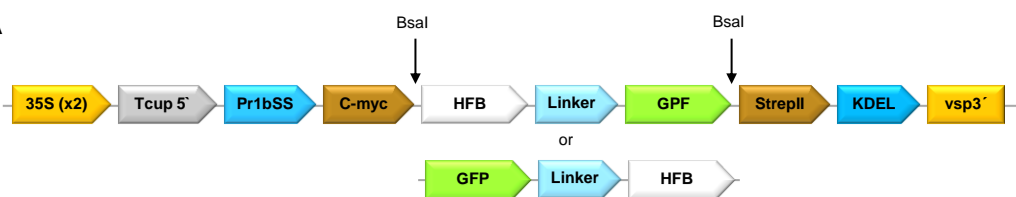

B

```
1      10      20      30      40      50      60      70      80
ATGGGATTTTTCCTTTTACAAATGCCCTCATTTTTCTTGTCTCTACACTTCTCTTATTCTTAATAATATCTCACTCTTCTCATGC
M G F F L F S Q M P S F F L V S T L L L F L I I S H S S H A
                                Pr1b SS

90     100     110     120     130     140     150     160     170
CTCTAGAGAGCAGAAGTTGATTTCAGGAGGATCTTGTCTTTTSCCCTACTGGATTGTTCTCTAACCCCTTATGTTGTGCTACTAATG
S R E Q K L I S E E D L A V C P T G L F S N P L C C A T N
1 XbaI c-myc HFBII

180     190     200     210     220     230     240     250     260
TGTGGATTGATTGGTGTGGATTGTAAGACTCCTACTATTGCTGTTGATACAGGTGCAATCTTCAAGCTCATTGTGCATCTAAGGGA
V L D L I G V D C K T P T I A V D T G A I F Q A H C A S K G
                                HFBII

270     280     290     300     310     320     330     340     350
TCAAAACCTCTTTGCTGTGTCTCCAGTTGCAGATCAGGCTTTATTATGCCAGAAGGCTATTGGTACTTTTCGGTGGAGGCTCTGGTGG
S K P L C C V A P V A D Q A L L C Q K A I G T F G G G S G G
                                HFBII linker

360     370     380     390     400     410     420     430     440
AGGCTCAGGTGGAGGCAGTGAAGACCTTTACTTCCAAGGAATGGTGAGCAAGGGCGAGGAGCTGTTCACCGGGGTGGTGGCCATCTTGG
G S G G G S E N L Y F Q G M V S K G E E L F T G V V P I L
                                linker GFP

450     460     470     480     490     500     510     520     530
TCGAGCTGGACGGCGACGTAAACGGCCACAAGTTCAGCGTGTCCGGCGAGGGCGAGGGCGATGCCACCTACGGCAAGCTGACCCCTGAAG
V E L D G D V N G H K F S V S G E G E G D A T Y G K L T L K
                                GFP

540     550     560     570     580     590     600     610     620
TTTATCTGCACCAACCGCAAGCTGCGCTGGCCCAACCTCGTGACCAACCTGACCTACGGCGTGCAGTGTTCAGCCGCTACCC
F I C T T G K L P V P W P T L V T T L T Y G V Q C F S R Y P
                                GFP

630     640     650     660     670     680     690     700     710
CGACCACATGAAGCAGCACGACTTCTTCAAGTCCGCCATGCCCAAGGCTACGTCCAGGAGCGCACCATCTTCTTCAAGGACGACGGCA
D H M K Q H D F F K S A M F E G Y V Q E R T I F F K D D G
                                GFP

720     730     740     750     760     770     780     790     800
ACTACAAGACCCGCGCGAGGTGAAGTTCGAGGGCGACACCTTGGTGAACCGCATCGAGCTGAAGGGCATCGACTTCAAGGAGGACGGC
N Y K T R A E V K F E G D T L V N R I E L K G I D F K E D G
                                GFP

810     820     830     840     850     860     870     880     890
AACATCTGGGGCACAAGCTGGAGTACAACAGCCACAACGCTCTATATCATGGCCGACAAGCAAGAAGCAAGCATCAAGGTGAA
N I L G H K L E Y N Y N S H N V Y I M A D K Q K N G I K V N
                                GFP

900     910     920     930     940     950     960     970
CTTCAAGATCCGCCACAACATCGAGGACGGCAGCTGCTGCGGACCACTACCAGACAACACCCCATCGGGCGACGGCCCCGTGC
F K I R H N I E D G S V Q L A D H Y Q Q N T P I G D G P V
                                GFP

980     990     1,000     1,010     1,020     1,030     1,040     1,050     1,060
TGTGTCGGACCAACCACTACCTGAGCACCCAGTCCGCCCTTGAGCAAAGACCCCAAGCAAGCAAGCAAGCAAGCAAGCAAGCAAG
L L P D N H Y L S T Q S A L S K D P N E K R D H M V L L E F
                                GFP

1,070     1,080     1,090     1,100     1,110     1,120     1,130     1,140     1,152
GTGACCGCGCGGGATCACTCTCGGCATGGACGAGCTGTACAAGTGGTCCCACCCTCAGTTCGAGAAGAAGGATGAGCTTTGA
V T A A G I T L G M D E L Y K W S H P Q F E K R D E L *
                                GFP streptII KDEL
```

C

```
1      10      20      30      40      50      60
GCACCAAGTAGTGATGTGAACGGTATTATCAGGAGGGCTAACGCTTTTGTCCAGAGGGTTTATTA
A P S S D V N G I I R R A N A F C P E G L L A
                                HFBIII

70     80     90     100     110     120     130
TACACCAATCCTTTATGCTGTGATCTTGATGTTTGGGTGTGGCTGATGTGATTTGTGTGTGCTT
Y T N P L C C D L D V L G V A D V D C V V P
                                HFBIII

140     150     160     170     180     190
CCAGCAAAGCCTTTCTATGCAAGTCTTTTGGTTCGTGCGCTTCAATGGAAGAAGCAAGG
F A R P S S C K S F G S V C A S I G R K P R
                                HFBIII

200     210     220     230     240     250     258
TGCTGTGCTGTGCCTGTGTGCTGGTGTGCTTTGTTATGTACCGATCCTATTCCTGCTATC
C C A V P V A G V A L L C T D P I P A I
                                HFBIII
```

D

```
1      10      20      30      40      50      60
GCTCTGCTCAAGAGGCTGTGCTGATATTGCTATTCTCGATGGTCCCTTGTACTGCTGTGACT
A P A Q E A A A D I A I L D G P C T A G G V T
                                HFBIV

70     80     90     100     110     120     130
AACACATCCCTATGTGCTGTGGTTCGTGATTTCTTGATCTTTTGTATTGGATGTGAAATCTC
N N I P M C C G S G I L D L L Y L D C E T P
                                HFBIV

140     150     160     170     180     190
ACACAAGCTACCTCTGTGTTTAAATCCACTCTCAGCAGTTTGCAGTAGAGTGAGGATTAACAGGCTAAG
T Q A T S V L N P L S A V C G R V G L Q A K
                                HFBIV

200     210     220     230     240     250     255
TGTTGTACCCCTCGGAATTGCTGATTGGGAGTTTATGCCAGGATGCTTTGCCAGAA
C C T L G I A D L G V L C Q D A L P E
                                HFBIV
```

E

```
1      10      20      30      40      50      60
GCACCTCAACCTAATATGAAGTTACCTAGATCACCTGTTTCTCTGGACTCACCTCAACCCCTCAA
A P Q P N M K L P R S P V C S G L T S T P Q
                                HFBV

70     80     90     100     110     120     130
TGCTGCGCTACCGATGTGTTAGGTGTGTGATCTTGATTGTCAAACCTCCTTCTTCACTGTGCTCA
C C A T D V L G V A D L D C Q T P S S P V P
                                HFBV

140     150     160     170     180     190
GATGCTCAGACATTGGAAGCAGTGTGCGCTGCAGGTGGACAAAGAGCAAGGTGTGCGCTATCCCT
D A Q T F E A V C A A G G Q R A R C C A I P
                                HFBV

200     210     220     230     240
GTTGCTGGACAAGATTGCTCTGCCAAACTCCTGCTGCTATC
V A G Q D L L C Q T P A G I
                                HFBV
```

F

```
1      10      20      30      40      50      60
ACTGTTGGTGGTGGAGATGATGGAGATGGAGGATCAGGCTTCAGATTGTGTCGCCAGGTATTCTTT
T V G G G D D G D G E D Q A S D L C P G I L
                                HFBVI

70     80     90     100     110     120     130
TATGCTAGTCTCAATGCTGCGATACTTCTGTTTAGGTCTTTTGGATCTTTTCTGTGAACCTCCA
Y A S P Q C C D T S V L G L L D L S C E F P
                                HFBVI

140     150     160     170     180     190
AGATCAGCTCCTGCAGATGTTGAGGCTTTTAAATGATATTGCCAAGAGGTGGGTGCTAAGGCTCAA
R S A P A D V E A F N D I C Q E V G A K A Q
                                HFBVI

200     210     220     230     240     243
TGTTGCGTGTCTCCAGTTGCTTTATTATGCGAGGATGTTCCAAAT
C C V L P V A L L C E D V P N
                                HFBVI
```

G

```
1      10      20      30      40      50      60
GCACCAGCTCCAGGAAACTACGAAGTGGAACTTAGAACAGGAGGAAGTAACAACGGAATAACCAG
A P A P G N Y E V E P R T G G S N N G N N Q
                                HYD3

70     80     90     100     110     120     130
CCTGCTTGCTCTGCTCAATCTAGTAATGTTTGTGCAACGGTCTTGGATGTTTGGTGCAAATTTTA
P A C S A Q S S N V C C N G L G C L V Q I L
                                HYD3

140     150     160     170     180     190
GGTGTCTGGATGCTCTACTAAGTCATATTGTTGCCAGTCTGATGCTCCTCTGTGTGGTGTCTTTG
G A G C T K S Y C C Q S D A P L A V G A T L
                                HYD3

200     210     220     230     234
GTGAACGTGAACGCATTAAACTGTGTGCAGGTGTG
V N V N A L N C V Q V L
                                HYD3
```

H

```
1      10      20      30      40      50      60
GCTCCTGCTACTTCTCTCAACGGATACGATGCTTGCCAGATGGTGGTCTTATTGGTACTCCTCAG
A P A T S P N G Y D A C P D G G L I G T P Q
                                HYD4

70     80     90     100     110     120     130
TGTTGTTCTTTTGGATTGGTGTGTTCTTTTCAGGAGAATGTTCTTCACCTAGTAAGACTCCAAT
C C S L D L V G V L S G E C S S P S K T P N
                                HYD4

140     150     160     170     180     190
TCTGCTAAGGAATTTCAAGAGATCTGCGTGCATCTGGTCAGAAGGCAAGATGTTGTTCTCTTTCA
S A K E F Q E I C A A S G Q K A R C C F L S
                                HYD4

200     210     220     230     240     249
GAAGTGTTFACCTTGGGAGCATTTTCCAGAAAGCCAGTGGGAGTGACCGCA
E V F T L G A F C Q K P V G V T A
                                HYD4
```

I

```
1      10      20      30      40      50      60
GTTAGTGTCTCTCCCTACCGAGGAAAAAGGCAGGCTTACATCCCATGCTCTGGACTCTACGGAACA
V S A L P T E E K R Q A Y I P C S G L Y G T A
                                HYD5

70     80     90     100     110     120     130
TCTCAATGCTGTGCTACCGATGTTCTTGCTGTGGCTGATTGGATTGTGGAATCTCTCCATCTACT
S Q C C A T D V L G V A D L D C G N P P S T
                                HYD5

140     150     160     170     180     190
CCTGTCTAAGCAACAGATTTTCTGCTGTGTTTTCAGCAATTTGGTCAGAGCAAGGTCTGCGCTT
P A Q A T D F C A V C S A I G Q R A A R G T C C V
                                HYD5

200     210     220     230     240     250     252
TTGCCAATCCTCGATCAGGGAATCTTTTGTAAATACCCCAACTGGTGTTCAGAT
L P I L D Q G I L C N T P P T G V Q D
                                HYD5
```

**S1 Fig. Expression cassettes and amino acid sequences.** (A) A schematic presentation of the expression cassettes. Genes for HFB, linker and GFP were cloned in the vector between BsaI restriction sites using Golden gate assembly. (B) The full nucleotide and amino acid sequences of the coding region of the expression cassette for representative nucleotide: HFBII-GFP. (C) Sequence data for HFBIII, (D) HFBIV, (E) HFBV, (F) HFBVI, (G) HYD3, (H) HYD4 and (I) HYD5.
